# Supplementary material for: Stripe and spot selection in cusp patterning of mammalian molar formation
Source: PubMed Central journal article supplement (PMC9197828; doi:10.1038/s41598-022-13539-w), 2022-06-14

**a**

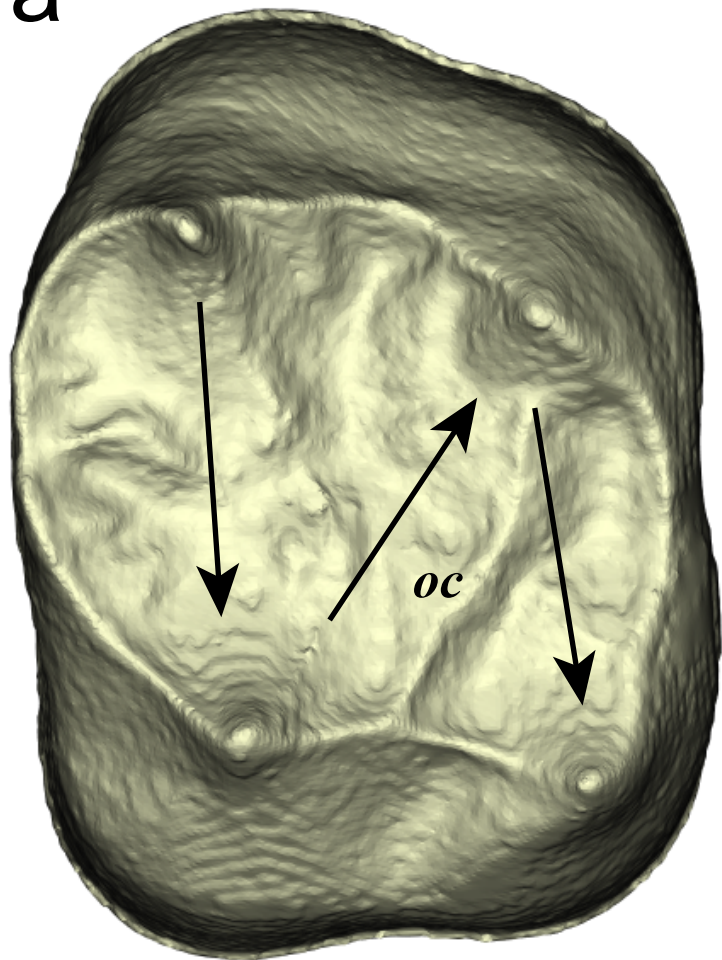

10mm

**b**

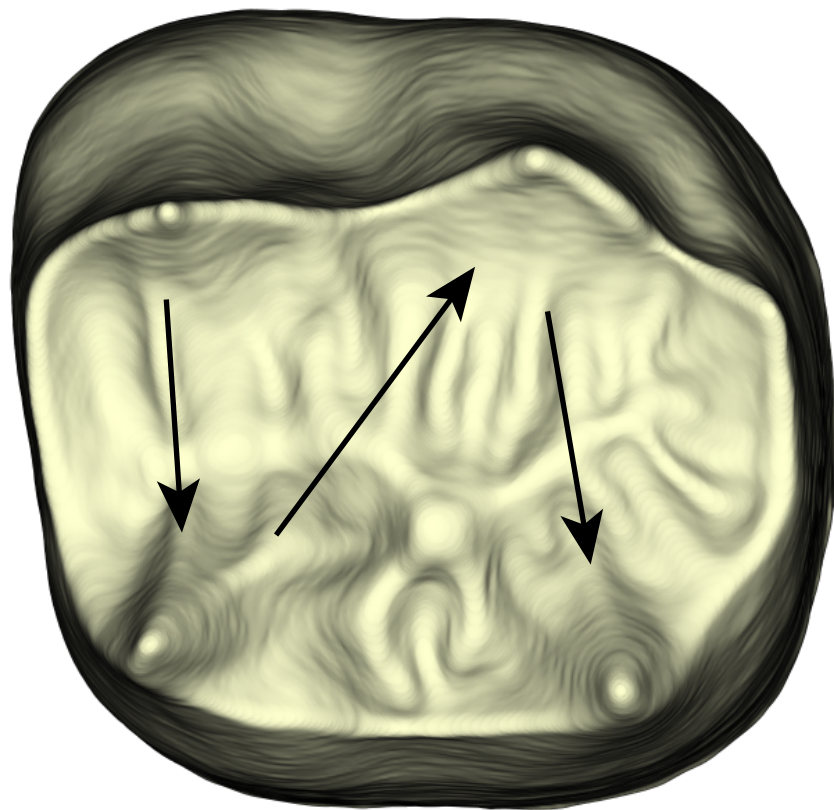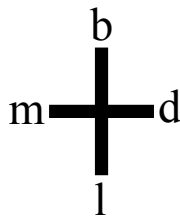

Supplement: 41598_2022_13539_MOESM1_ESM.pdf [file 41598_2022_13539_MOESM1_ESM.pdf]
